# Supplementary material for: Social Environmental Predictors of COVID-19 Vaccine Hesitancy in India: A Population-Based Survey
Source: MDPI journal article supplement (doi:10.3390/vaccines10101749), 2022-10-19
Supplement: s1 [file s1]

Survey form:

| Kindly fill/mark all the components of this survey form                                                                                                                                                                                                                                                                                                                                                                                                                                                                                                                                                                                                                                                            |                                                                                                                                                                                                                                                                                                                                                                                                                                                                                                                                  |  |
|--------------------------------------------------------------------------------------------------------------------------------------------------------------------------------------------------------------------------------------------------------------------------------------------------------------------------------------------------------------------------------------------------------------------------------------------------------------------------------------------------------------------------------------------------------------------------------------------------------------------------------------------------------------------------------------------------------------------|----------------------------------------------------------------------------------------------------------------------------------------------------------------------------------------------------------------------------------------------------------------------------------------------------------------------------------------------------------------------------------------------------------------------------------------------------------------------------------------------------------------------------------|--|
| <b>1. Age</b>                                                                                                                                                                                                                                                                                                                                                                                                                                                                                                                                                                                                                                                                                                      |                                                                                                                                                                                                                                                                                                                                                                                                                                                                                                                                  |  |
| <b>2. Sex</b> Male<br>Female                                                                                                                                                                                                                                                                                                                                                                                                                                                                                                                                                                                                                                                                                       |                                                                                                                                                                                                                                                                                                                                                                                                                                                                                                                                  |  |
| <b>3. Occupation</b><br>School student<br>Government employee<br>Employee in state owned company<br>Employee in private and foreign companies<br>Other occupations                                                                                                                                                                                                                                                                                                                                                                                                                                                                                                                                                 |                                                                                                                                                                                                                                                                                                                                                                                                                                                                                                                                  |  |
| <b>4. Level of Education</b><br>Primary school (Standard 1-7)<br>High school<br>Undergraduate<br>Post graduate and above                                                                                                                                                                                                                                                                                                                                                                                                                                                                                                                                                                                           |                                                                                                                                                                                                                                                                                                                                                                                                                                                                                                                                  |  |
| <b>5. Information reception about the COVID-19 vaccine:</b><br><br><div> <b>Official source</b><br/>           (1) information disclosure by the government<br/>           (2) public voices of experts and scholars in medical and other fields<br/><br/> <b>Unofficial source</b><br/>           (1) online opinion leaders (e.g., internet verified celebrities from the social media platform)<br/>           (2) internet users' opinions<br/>           (3) gossip<br/>           (4) overseas institutions (e.g., foreign governments, research institutions, media)<br/>           (5) chatting with family and friends, both online (e.g., WeChat, phone call) and offline (face-to-face).         </div> | <div>           Answer each of the question in the following frequency (<i>circle or tick on the number that mostly satisfies your answer</i>):<br/><br/>           1-never<br/><br/>           2-very rarely<br/><br/>           3- Rarely<br/><br/>           4-occasionaly<br/><br/>           5-often         </div> <div>           1 2 3 4 5 6 7<br/><br/>           1 2 3 4 5 6 7<br/><br/>           1 2 3 4 5 6 7<br/>           1 2 3 4 5 6 7<br/>           1 2 3 4 5 6 7<br/>           1 2 3 4 5 6 7         </div> |  |

|                                                                                                                          |        |  |
|--------------------------------------------------------------------------------------------------------------------------|--------|--|
| 6. Do you trust the information provided by government departments about the COVID-19 vaccine?                           | Yes/No |  |
| 7. Do you trust the vaccine recommendations provided by your doctor?                                                     | Yes/No |  |
| 8. Do you believe that the government will make a decision in your best interests as to what kind of vaccine to provide? | Yes/No |  |
| 9. Can you feel that the doctor who serves you cares about what is best for your health?                                 | Yes/No |  |
| 10. Are you worried that you may have serious side effects due to COVID-19 vaccination?                                  | Yes/No |  |
| 11. Are you concerned that the COVID-19 vaccine may not be safe to administer?                                           | Yes/No |  |
| 12. Are you concerned that the COVID-19 vaccine may not be able to prevent COVID-19?                                     | Yes/No |  |
